# Supplementary material for: Polyphenolic extract of InsP 5-ptase expressing tomato plants reduce the proliferation of MCF-7 breast cancer cells
Source: PubMed Central journal article supplement (PMC5407797; doi:10.1371/journal.pone.0175778), 2017-04-27
Supplement: pone.0175778.s005.pdf [file pone.0175778.s005.pdf]

**S1 Table. List of the compounds identified by Metaboanalyst software and were found significantly up-regulated in transgenic fruits of lines 6 and 7.**

35 compounds have been tentatively identified by comparison to either a database or publication, 11 of which are flavonoids. Where the table lists KEGG as a source, MZmine software was used to compare the peak list to the database for identification purposes before the peak list was uploaded to Metaboanalyst, which was used for statistical analysis after MZmine completed processing the raw data. Not all compounds are in the KEGG database, but KEGG IDs are listed for those that were found.

| m/z      | RT (min) | KEGG ID | Tentative Identification                | Source                                                      | Group                       |
|----------|----------|---------|-----------------------------------------|-------------------------------------------------------------|-----------------------------|
| 119.1066 | 28.6     | C00601  | Phenylacetylaldehyde                    | KEGG                                                        | aldehydes                   |
| 128.1572 | 9.6      | C01879  | Pyroglutamic Acid                       | Gómez-Romero, Segura-Carretero, & Fernández-Gutiérrez, 2010 | amino acids and derivatives |
| 130.3659 | 10.7     | C00123  | Fructosyl leucine (-hexose)             | Gómez-Romero, Segura-Carretero, & Fernández-Gutiérrez, 2010 | amino acids and derivatives |
| 151.1071 | 28.6     | C07271  | Limonene Oxide                          | Gómez-Romero, Segura-Carretero, & Fernández-Gutiérrez, 2010 | terpenoids                  |
| 170.8274 | 28.5     |         |                                         |                                                             |                             |
| 267.2984 | 10.4     | C02572  | Feruloylquinic Acid                     | Gómez-Romero, Segura-Carretero, & Fernández-Gutiérrez, 2010 | hydroxycinnamic acids       |
| 271.5263 | 28.6     | C00509  | Naringenin                              | Gómez-Romero, Segura-Carretero, & Fernández-Gutiérrez, 2010 | flavonoids                  |
| 278.8388 | 28.6     | C01964  | Tos-Ph-CH <sub>2</sub> Cl               | KEGG                                                        | sulfonic acid derivative    |
| 278.8401 | 28.5     |         |                                         |                                                             |                             |
| 278.8969 | 28.6     |         |                                         |                                                             |                             |
| 290.5020 | 6.8      |         | Fructosyl Glutamate (-H <sub>2</sub> O) | Gómez-Romero, Segura-Carretero, & Fernández-Gutiérrez, 2010 | amino acids and derivatives |
| 292.7480 | 28.6     |         | Fructosyl leucine                       | Gómez-Romero, Segura-Carretero, & Fernández-Gutiérrez, 2010 | amino acids and derivatives |
| 310.8639 | 28.6     |         |                                         |                                                             |                             |

|              |        |  |                                                       |                                                             |                       |
|--------------|--------|--|-------------------------------------------------------|-------------------------------------------------------------|-----------------------|
| 310.880328.6 |        |  |                                                       |                                                             |                       |
| 311.005128.6 |        |  | Hydroperoxy-octadecanedioic acid                      | Gómez-Romero, Segura-Carretero, & Fernández-Gutiérrez, 2010 | fatty acids           |
| 320.853928.5 |        |  |                                                       |                                                             |                       |
| 320.897628.7 |        |  |                                                       |                                                             |                       |
| 320.980628.8 | C00364 |  | Thymidine 5'-phosphate                                | KEGG                                                        | nucleotides           |
| 324.855928.6 | C14967 |  | 1-[2-Bromo-1-(4-chlorophenyl)ethenyl]-2-chlorobenzene | KEGG                                                        | diarylmethane         |
| 324.914028.6 |        |  |                                                       |                                                             |                       |
| 324.941728.6 |        |  |                                                       |                                                             |                       |
| 365.547516.8 |        |  |                                                       |                                                             |                       |
| 365.687116.9 |        |  |                                                       |                                                             |                       |
| 367.256510.5 | C03309 |  | Strictosidine aglycone                                | KEGG                                                        | alkaloids             |
| 368.679828.5 |        |  |                                                       |                                                             |                       |
| 435.041025.4 | C01604 |  | Phlorizin                                             | KEGG                                                        | flavonoids            |
| 440.150425.3 | C00504 |  | Folate                                                | KEGG                                                        | vitamins              |
| 451.173922.3 | C07349 |  | 3'-Demethylstaurosporine                              | KEGG                                                        | alkaloids             |
| 452.75874.3  |        |  | Torvanol A                                            | KNAPSAck                                                    | hydrogen sulfate salt |
| 455.021522.3 | C00061 |  | Riboflavin-5-phosphate                                | KEGG                                                        | coenzymes             |
| 456.199522.3 | C00143 |  | 5,10-Methylenetetrahydrofolate                        | KEGG                                                        | coenzymes             |
| 456.394522.2 |        |  |                                                       |                                                             |                       |
| 456.43785.3  |        |  |                                                       |                                                             |                       |
| 456.778122.3 |        |  |                                                       |                                                             |                       |
| 457.09175.3  | C01847 |  | Reduced Flavin Mononucleotide                         | KEGG                                                        | coenzymes             |

|              |  |  |  |  |
|--------------|--|--|--|--|
| 464.89314.2  |  |  |  |  |
| 464.92684.2  |  |  |  |  |
| 499.482923.3 |  |  |  |  |
| 499.803522.7 |  |  |  |  |
| 499.918725.4 |  |  |  |  |
| 500.086125.4 |  |  |  |  |
| 500.199423.0 |  |  |  |  |
| 500.19965.2  |  |  |  |  |
| 500.222223.5 |  |  |  |  |
| 500.325923.1 |  |  |  |  |
| 500.425725.4 |  |  |  |  |
| 500.668425.4 |  |  |  |  |
| 500.783225.4 |  |  |  |  |
| 501.71313.6  |  |  |  |  |
| 514.61473.8  |  |  |  |  |
| 554.836928.6 |  |  |  |  |
| 554.848428.5 |  |  |  |  |
| 558.617320.1 |  |  |  |  |
| 564.771328.6 |  |  |  |  |
| 565.777728.6 |  |  |  |  |
| 566.512623.7 |  |  |  |  |
| 566.728623.6 |  |  |  |  |
| 567.110723.7 |  |  |  |  |

|              |        |                                  |                                                             |              |
|--------------|--------|----------------------------------|-------------------------------------------------------------|--------------|
| 593.199026.3 | C03870 | Isoorientin 2"-O-rhamnoside      | KEGG                                                        | flavonoids   |
| 594.868328.5 | C15641 | XCT790                           | KEGG                                                        | cinnamamides |
| 594.876419.6 |        |                                  |                                                             |              |
| 594.885419.7 |        |                                  |                                                             |              |
| 594.908319.7 |        |                                  |                                                             |              |
| 594.925428.4 |        | Kaempferol 3-O-Rutinoside        | KomicMarket                                                 | flavonoids   |
| 595.808921.3 | C00509 | Naringenin dihexose              | Gómez-Romero, Segura-Carretero, & Fernández-Gutiérrez, 2010 | flavonoids   |
| 597.008822.8 |        |                                  |                                                             |              |
| 597.204523.4 | C00774 | Phloretin Dihexoside             | Gómez-Romero, Segura-Carretero, & Fernández-Gutiérrez, 2010 | flavonoids   |
| 597.701522.5 |        |                                  |                                                             |              |
| 605.95485.0  | C00043 | UDP-N-acetyl-alpha-D-glucosamine | KEGG                                                        | nucleotides  |
| 606.983911.6 |        |                                  |                                                             |              |
| 609.641921.2 |        | Rutin hexoside (-hexose)         | Gómez-Romero, Segura-Carretero, & Fernández-Gutiérrez, 2010 | flavonoids   |
| 609.717221.3 |        | Kaempferol 3,7-dihexoside        | Gómez-Romero, Segura-Carretero, & Fernández-Gutiérrez, 2010 | flavonoids   |
| 610.546921.2 |        |                                  |                                                             |              |
| 610.907726.1 |        |                                  |                                                             |              |
| 611.457121.1 |        |                                  |                                                             |              |
| 611.480321.1 |        |                                  |                                                             |              |
| 611.991526.1 |        |                                  |                                                             |              |
| 612.328821.1 |        |                                  |                                                             |              |

|              |        |                                                            |                                                             |  |             |
|--------------|--------|------------------------------------------------------------|-------------------------------------------------------------|--|-------------|
| 614.314022.0 |        |                                                            |                                                             |  |             |
| 614.348122.1 |        |                                                            |                                                             |  |             |
| 614.83164.8  |        |                                                            |                                                             |  |             |
| 622.893028.5 |        |                                                            |                                                             |  |             |
| 622.933728.6 |        |                                                            |                                                             |  |             |
| 622.940128.6 |        |                                                            |                                                             |  |             |
| 624.889820.2 |        |                                                            |                                                             |  |             |
| 624.909420.2 |        |                                                            |                                                             |  |             |
| 626.921023.3 |        |                                                            |                                                             |  |             |
| 626.990523.4 |        |                                                            |                                                             |  |             |
| 630.897519.5 |        |                                                            |                                                             |  |             |
| 630.920419.5 |        |                                                            |                                                             |  |             |
| 630.950119.4 |        |                                                            |                                                             |  |             |
| 630.971020.5 | C19971 | UDP-2,4-bis(acetamido)-2,4,6-trideoxy-beta-L-altropyranose | KEGG                                                        |  | nucleotides |
| 635.126128.3 |        |                                                            |                                                             |  |             |
| 635.159228.3 | C04360 | 1-O,2-O,6-O-Trigalloyl-beta-D-glucose                      | KEGG                                                        |  | tannins     |
| 635.233428.2 |        |                                                            |                                                             |  |             |
| 637.776524.6 |        |                                                            |                                                             |  |             |
| 637.927624.8 | C12632 | Luteolin 7-O-beta-D-diglucuronide                          | KEGG                                                        |  | flavonoids  |
| 638.583124.9 |        |                                                            |                                                             |  |             |
| 638.693724.8 |        |                                                            |                                                             |  |             |
| 639.189223.5 | C10084 | Isorhamnetin 3-sophoroside                                 | Gómez-Romero, Segura-Carretero, & Fernández-Gutiérrez, 2010 |  | flavonoids  |

|              |        |                      |          |                       |
|--------------|--------|----------------------|----------|-----------------------|
| 646.934521.1 |        |                      |          |                       |
| 647.023521.1 |        |                      |          |                       |
| 652.893715.0 |        |                      |          |                       |
| 652.897015.1 |        |                      |          |                       |
| 653.000222.1 |        | Cilistol p           | KNAPSAck | steroid glycoside     |
| 653.036522.1 |        |                      |          |                       |
| 653.529427.5 | C05811 | 3-Octoprenylcatechol | KEGG     | flavonoids            |
| 655.138725.4 |        |                      |          |                       |
| 655.184225.3 | C10466 | Hellicoside          | KEGG     | hydroxycinnamic acids |
| 660.847520.6 |        |                      |          |                       |
| 680.822724.7 |        |                      |          |                       |
| 680.880924.9 |        |                      |          |                       |
| 682.906124.5 |        |                      |          |                       |
| 754.874321.4 |        |                      |          |                       |
| 755.823221.4 |        |                      |          |                       |
| 758.862621.0 |        |                      |          |                       |
| 758.874221.0 |        |                      |          |                       |
