# Supplementary material for: Polyphenolic extract of InsP 5-ptase expressing tomato plants reduce the proliferation of MCF-7 breast cancer cells
Source: PubMed Central journal article supplement (PMC5407797; doi:10.1371/journal.pone.0175778), 2017-04-27
Supplement: pone.0175778.s006.pdf [file pone.0175778.s006.pdf]

**S2 Table. Identified up-regulated compounds in transgenic tomato fruits.** The list of KEGG IDs from S1 Table was entered into the KEGG Pathway search that resulted in the 35 tentatively identified compounds that were up-regulated in both transgenic lines (6, 7) and their associated pathways, if available. The most common pathways were metabolic and biosynthesis of secondary metabolites. The most common type of identified compound was in the flavonoid category.

| m/z      | RT (min) | KEGG ID | Tentative Identification    | Source                                                      | Group                       | KEGG Pathways                                                                                                                                                                                                                                                                               |
|----------|----------|---------|-----------------------------|-------------------------------------------------------------|-----------------------------|---------------------------------------------------------------------------------------------------------------------------------------------------------------------------------------------------------------------------------------------------------------------------------------------|
| 119.1066 | 28.6     | C00601  | Phenylacetylaldehyde        | KEGG                                                        | aldehydes                   | Metabolic pathways, Phenylalanine metabolism                                                                                                                                                                                                                                                |
| 128.1572 | 9.6      | C01879  | Pyroglutamic Acid           | Gómez-Romero, Segura-Carretero, & Fernández-Gutiérrez, 2010 | amino acids and derivatives | Glutathione metabolism                                                                                                                                                                                                                                                                      |
| 130.3659 | 10.7     | C00123  | Fructosyl leucine (-hexose) | Gómez-Romero, Segura-Carretero, & Fernández-Gutiérrez, 2010 | amino acids and derivatives | Metabolic pathways, Biosynthesis of secondary metabolites, ABC transporters, Valine, leucine and isoleucine degradation, Aminoacyl-tRNA biosynthesis, Valine, leucine and isoleucine biosynthesis, Glucosinolate biosynthesis, Biosynthesis of amino acids, 2-Oxocarboxylic acid metabolism |
| 151.1071 | 28.6     | C07271  | Limonene Oxide              | Gómez-Romero, Segura-Carretero, & Fernández-Gutiérrez, 2010 | terpenoids                  | Limonene and pinene degradation                                                                                                                                                                                                                                                             |
| 267.2984 | 10.4     | C02572  | Feruloylquinic Acid         | Gómez-Romero, Segura-                                       | hydroxycinnamic acids       |                                                                                                                                                                                                                                                                                             |

|              |        |                                         |  |                                                             |                             |                                                                                   |
|--------------|--------|-----------------------------------------|--|-------------------------------------------------------------|-----------------------------|-----------------------------------------------------------------------------------|
|              |        |                                         |  | Carretero, & Fernández-Gutiérrez, 2010                      |                             |                                                                                   |
| 271.526328.6 | C00509 | Naringenin                              |  | Gómez-Romero, Segura-Carretero, & Fernández-Gutiérrez, 2010 | flavonoids                  | Metabolic pathways, Biosynthesis of secondary metabolites, Flavonoid biosynthesis |
| 278.838828.6 | C01964 | Tos-Ph-CH <sub>2</sub> Cl               |  | KEGG                                                        | sulfonic acid derivative    |                                                                                   |
| 290.50206.8  |        | Fructosyl Glutamate (-H <sub>2</sub> O) |  | Gómez-Romero, Segura-Carretero, & Fernández-Gutiérrez, 2010 | amino acids and derivatives |                                                                                   |
| 292.748028.6 |        | Fructosyl leucine                       |  | Gómez-Romero, Segura-Carretero, & Fernández-Gutiérrez, 2010 | amino acids and derivatives |                                                                                   |
| 311.005128.6 |        | Hydroperoxy-octadecanedioic acid        |  | Gómez-Romero, Segura-Carretero, & Fernández-Gutiérrez, 2010 | fatty acids                 |                                                                                   |

|          |      |        |                                                       |                                                        |                       |                                                                                                             |
|----------|------|--------|-------------------------------------------------------|--------------------------------------------------------|-----------------------|-------------------------------------------------------------------------------------------------------------|
| 320.9806 | 28.8 | C00364 | Thymidine 5'-phosphate                                | KEGG                                                   | nucleotides           | Metabolic pathways, Pyrimidine metabolism                                                                   |
| 324.8559 | 28.6 | C14967 | 1-[2-Bromo-1-(4-chlorophenyl)ethenyl]-2-chlorobenzene | KEGG                                                   | diarylmethane         |                                                                                                             |
| 367.2565 | 10.5 | C03309 | Strictosidine aglycone                                | KEGG                                                   | alkaloids             | Metabolic pathways, Biosynthesis of secondary metabolites                                                   |
| 435.0410 | 25.4 | C01604 | Phlorizin                                             | KEGG                                                   | flavonoids            |                                                                                                             |
| 440.1504 | 25.3 | C00504 | Folate                                                | KEGG                                                   | vitamins              | Metabolic pathways, One carbon pool by folate, Folate biosynthesis                                          |
| 451.1739 | 22.3 | C07349 | 3'-Demethylstaurosporine                              | KEGG                                                   | alkaloids             |                                                                                                             |
| 452.7587 | 4.3  |        | Torvanol A                                            | KNAPSAck                                               | hydrogen sulfate salt |                                                                                                             |
| 455.0215 | 22.3 | C00061 | Riboflavin-5-phosphate                                | KEGG                                                   | coenzymes             | Metabolic pathways, Biosynthesis of secondary metabolites, Riboflavin metabolism, Oxidative phosphorylation |
| 456.1995 | 22.3 | C00143 | 5,10-Methylenetetrahydrofolate                        | KEGG                                                   | coenzymes             | Metabolic pathways, One carbon pool by folate, Carbon metabolism, Glycine, serine and threonine metabolism  |
| 457.0917 | 5.3  | C01847 | Reduced Flavin Mononucleotide                         | KEGG                                                   | coenzymes             |                                                                                                             |
| 593.1990 | 26.3 | C03870 | Isoorientin 2"-O-rhamnoside                           | KEGG                                                   | flavonoids            | Metabolic pathways, Riboflavin metabolism                                                                   |
| 594.8683 | 28.5 | C15641 | XCT790                                                | KEGG                                                   | cinnamamides          |                                                                                                             |
| 594.9254 | 28.4 |        | Kaempferol 3-O-Rutinoside                             | KomicMarket                                            | flavonoids            |                                                                                                             |
| 595.8089 | 21.3 | C00509 | Naringenin dihexose                                   | Gómez-Romero, Segura-Carretero, & Fernández-Gutiérrez, | flavonoids            |                                                                                                             |

|              |        |                                                            |  |                                                             |             |                                                                                                            |
|--------------|--------|------------------------------------------------------------|--|-------------------------------------------------------------|-------------|------------------------------------------------------------------------------------------------------------|
|              |        |                                                            |  | 2010                                                        |             |                                                                                                            |
| 597.204523.4 | C00774 | Phloretin Dihexoside                                       |  | Gómez-Romero, Segura-Carretero, & Fernández-Gutiérrez, 2010 | flavonoids  |                                                                                                            |
| 605.95485.0  | C00043 | UDP-N-acetyl-alpha-D-glucosamine                           |  | KEGG                                                        | nucleotides | Amino sugar and nucleotide sugar metabolism, Vancomycin resistance, Insulin resistance, Metabolic pathways |
| 609.641921.2 |        | Rutin hexoside (-hexose)                                   |  | Gómez-Romero, Segura-Carretero, & Fernández-Gutiérrez, 2010 | flavonoids  |                                                                                                            |
| 609.717221.3 |        | Kaempferol 3,7-dihexoside                                  |  | Gómez-Romero, Segura-Carretero, & Fernández-Gutiérrez, 2010 | flavonoids  |                                                                                                            |
| 630.971020.5 | C19971 | UDP-2,4-bis(acetamido)-2,4,6-trideoxy-beta-L-altropyranose |  | KEGG                                                        | nucleotides | Amino sugar and nucleotide sugar metabolism                                                                |
| 635.159228.3 | C04360 | 1-O,2-O,6-O-Trigalloyl-beta-D-glucose                      |  | KEGG                                                        | tannins     |                                                                                                            |
| 637.927624.8 | C12632 | Luteolin 7-O-beta-D-diglucuronide                          |  | KEGG                                                        | flavonoids  | Flavone and flavonol biosynthesis                                                                          |
| 639.189223.5 | C10084 | Isorhamnetin 3-sophoroside                                 |  | Gómez-Romero,                                               | flavonoids  |                                                                                                            |

|              |        |  |                      |                                               |                       |                                                                                            |
|--------------|--------|--|----------------------|-----------------------------------------------|-----------------------|--------------------------------------------------------------------------------------------|
|              |        |  |                      | Segura-Carretero, & Fernández-Gutiérrez, 2010 |                       |                                                                                            |
| 653.000222.1 |        |  | Cilistol p           | KNAPSAck                                      | steroid glycoside     |                                                                                            |
| 653.529427.5 | C05811 |  | 3-Octoprenylcatechol | KEGG                                          | flavonoids            | Biosynthesis of secondary metabolites, Ubiquinone and other terpenoid-quinone biosynthesis |
| 655.184225.3 | C10466 |  | Hellicoside          | KEGG                                          | hydroxycinnamic acids |                                                                                            |
