# Supplementary material for: Polyphenolic extract of InsP 5-ptase expressing tomato plants reduce the proliferation of MCF-7 breast cancer cells
Source: PubMed Central journal article supplement (PMC5407797; doi:10.1371/journal.pone.0175778), 2017-04-27
Supplement: pone.0175778.s007.pdf [file pone.0175778.s007.pdf]

**S3 Table. List of genes involved in transcription of RNA polymerase II promoter found by using PANTHER classification software analysis.**  
The genes labeled in red are genes that were up-regulated in the cells after treatment with total metabolite extract of transgenic fruits (L6 and L7) and genes labeled green are the genes that were down-regulated after the same treatment.

|   | Gene ID | Gene Name                                 | Gene Symbol | ortholog | PANTHER Protein Class                                      | PANTHER Family/Subfamily                                                                                                |              |
|---|---------|-------------------------------------------|-------------|----------|------------------------------------------------------------|-------------------------------------------------------------------------------------------------------------------------|--------------|
| 1 | 10322   | SET and MYND domain-containing protein 5  | SMYD5       | ortholog | SET AND MYND DOMAIN-CONTAINING PROTEIN 5 (PTHR12197:SF153) | transcription cofactor                                                                                                  | Homo sapiens |
| 2 | 23613   | Protein kinase C-binding protein 1        | ZMYND8      | ortholog | PROTEIN KINASE C-BINDING PROTEIN 1 (PTHR24102:SF13)        | transcription cofactor ubiquitin-protein ligase                                                                         | Homo sapiens |
| 3 | 4089    | Mothers against decapentaplegic homolog 4 | SMAD4       | ortholog | MOTHERS AGAINST DECAPENTAPLEGIC HOMOLOG 4 (PTHR13703:SF19) | transcription factor                                                                                                    | Homo sapiens |
| 4 | 155054  | Zinc finger protein 425                   | ZNF425      | ortholog | ZINC FINGER PROTEIN 425 (PTHR24381:SF120)                  | KRAB box transcription factor                                                                                           | Homo sapiens |
| 5 | 4212    | Homeobox protein Meis2                    | MEIS2       | ortholog | HOMEBOX PROTEIN MEIS2 (PTHR11850:SF47)                     | DNA-directed RNA polymerase                                                                                             | Homo sapiens |
| 6 | 26986   | Polyadenylate-binding protein 1           | PABPC1      | ortholog | POLYADENYLATE-BINDING PROTEIN 1 (PTHR24011:SF233)          | transcription factor<br>DNA binding protein<br>mRNA polyadenylation factor<br>mRNA splicing factor<br>ribonucleoprotein | Homo sapiens |
| 7 | 3670    | Insulin gene enhancer protein ISL-1       | ISL1        | ortholog | INSULIN GENE ENHANCER PROTEIN ISL-1 (PTHR24204:SF3)        | homeobox transcription factor<br>zinc finger transcription factor                                                       | Homo sapiens |
| 8 | 219749  | Zinc finger protein 25                    | ZNF25       | ortholog | ZINC FINGER PROTEIN 25 (PTHR24381:SF62)                    | KRAB box transcription factor                                                                                           | Homo sapiens |
